# Supplementary material for: Out-of-Pocket Costs of Treatment Among Employer-Insured Women With Invasive Breast Cancer
Source: PubMed Central journal article supplement (PMC9984972; doi:10.1001/jamanetworkopen.2023.1507), 2023-03-03
Supplement: jamanetwopen-e231507-s001.pdf [file jamanetwopen-e231507-s001.pdf]

## Data Sharing Statement

Hager. Out-of-Pocket Costs of Treatment Among Employer-Insured Women With Invasive Breast Cancer. *JAMA Netw Open*. Published March 03, 2023.

doi:10.1001/jamanetworkopen.2023.1507

### Data

**Data available:** No

### Additional Information

**Explanation for why data not available:** The data are available under license from a private data vendor. We would be happy to make public our code and variable definitions if requested by the editors, reviewers or readers.
